# Supplementary material for: Assembly of three Nd(iii) 2,6-naphthalenedicarboxylates (ndc2−) 3D coordination polymers based on various secondary building units (SBUs): structural diversity and gas sorption properties
Source: Royal Society of Chemistry journal article supplement (doi:10.1039/c5ra10799g), 2015-01-01
Supplement: c5ra10799g1.pdf [file c5ra10799g1.pdf]

# Assemblies of Three Nd(III) 2,6-Naphthalenedicarboxylates (ndc<sup>2-</sup>) 3D Coordination Polymers Based on Various Secondary Building Units (SBUs): Structural Diversity and Gas Sorption Property

Chih-Chieh Wang,<sup>\*a</sup> Chang-Tsung Yeh,<sup>a</sup> Szu-Yu Ke,<sup>a</sup> Yi-Ting Cheng,<sup>a</sup> Ching-Chun Yang,<sup>a</sup>  
Gene-Hsiang Lee,<sup>b</sup> Chung-Kai Chang,<sup>c</sup> and Hwo-Shuenn Sheu<sup>\*c</sup>

<sup>a</sup>Department of Chemistry, Soochow University, Taipei, Taiwan. E-mail: ccwang@scu.edu.tw

<sup>b</sup>Department of Chemistry, National Taiwan University, Taipei, Taiwan.

<sup>c</sup>National Synchrotron Radiation Research Center, Hsinchu, Taiwan.

## Supplementary Materials:

STable 1. Related bond lengths (Å) and angles (°) around the Nd(III) ion for **1**.

STable 2. Related bond lengths (Å) and angles (°) around the Nd(III) ion for **2**.

STable 3. Related bond lengths (Å) and angles (°) around the Nd(III) ion for **3**.

SFigure 1 The 3D porous framework of **1** views along the *a* axis showing 1D channels.

SFigure 2 The 3D porous framework of **2** views along the *b* axis showing the rod-shaped arrangement.

SFigure 3 The 3D porous framework of **3** views along the *b* axis showing the rod-shaped arrangement.

SFigure 4 (a) Thermogravimetric analysis (TGA) of **1**, (b) *in-situ* PXRD of **1**.

SFigure 5 (a) Thermogravimetric analysis (TGA) of **2**, (b) *in-situ* PXRD of **2**.

SFigure 6 (a) Thermogravimetric analysis (TGA) of **3**, (b) *in-situ* PXRD of **3**.

**STable 1.** Related bond lengths (Å) and angles (°) around the Nd(III) ion for **1**.

|                     |          |                   |          |
|---------------------|----------|-------------------|----------|
| Nd(1)–O(6)#1        | 2.401(1) | Nd(1)–O(7)#3      | 2.470(1) |
| Nd(1)–O(2)#1        | 2.411(8) | Nd(1)–O(1)        | 2.481(9) |
| Nd(1)–O(8)#2        | 2.428(1) | Nd(1)–O(3)        | 2.501(7) |
| Nd(1)–O(9)          | 2.433(1) | Nd(1)–O(4)        | 2.511(8) |
| Nd(1)–O(5)          | 2.448(1) | Nd(1)–O(2)        | 2.659(8) |
| Nd(1)–O(10)         | 2.466(1) |                   |          |
| O(6)#1–Nd(1)–O(2)#1 | 68.4(5)  | O(10)–Nd(1)–O(3)  | 73.8(3)  |
| O(6)#1–Nd(1)–O(8)#2 | 12.4(4)  | O(7)#3–Nd(1)–O(3) | 149.1(4) |
| O(2)#1–Nd(1)–O(8)#2 | 77.8(4)  | O(1)–Nd(1)–O(3)   | 80.5(3)  |
| O(6)#1–Nd(1)–O(9)   | 129.1(5) | O(6)#1–Nd(1)–O(4) | 67.1(4)  |
| O(2)#1–Nd(1)–O(9)   | 80.8(3)  | O(2)#1–Nd(1)–O(4) | 86.1(3)  |
| O(8)#2–Nd(1)–O(9)   | 141.0(5) | O(8)#2–Nd(1)–O(4) | 74.9(4)  |
| O(6)#1–Nd(1)–O(5)   | 133.8(5) | O(9)–Nd(1)–O(4)   | 71.4(4)  |
| O(2)#1–Nd(1)–O(5)   | 84.3(4)  | O(5)–Nd(1)–O(4)   | 149.6(4) |
| O(8)#2–Nd(1)–O(5)   | 130.4(5) | O(10)–Nd(1)–O(4)  | 105.8(3) |
| O(9)–Nd(1)–O(5)     | 78.6(5)  | O(7)#3–Nd(1)–O(4) | 134.7(4) |
| O(6)#1–Nd(1)–O(10)  | 145.4(5) | O(1)–Nd(1)–O(4)   | 128.3(3) |
| O(2)#1–Nd(1)–O(10)  | 146.1(4) | O(3)–Nd(1)–O(4)   | 51.7(3)  |
| O(8)#2–Nd(1)–O(10)  | 135.6(5) | O(6)#1–Nd(1)–O(2) | 73.3(4)  |
| O(9)–Nd(1)–O(10)    | 73.7(4)  | O(2)#1–Nd(1)–O(2) | 74.7(3)  |
| O(5)–Nd(1)–O(10)    | 69.4(4)  | O(8)#2–Nd(1)–O(2) | 67.1(4)  |
| O(6)#1–Nd(1)–O(7)#3 | 134.4(5) | O(9)–Nd(1)–O(2)   | 136.3(4) |
| O(2)#1–Nd(1)–O(7)#3 | 73.6(4)  | O(5)–Nd(1)–O(2)   | 63.7(4)  |
| O(8)#2–Nd(1)–O(7)#3 | 135.6(5) | O(10)–Nd(1)–O(2)  | 109.6(3) |
| O(9)–Nd(1)–O(7)#3   | 65.6(5)  | O(7)#3–Nd(1)–O(2) | 73.0(4)  |
| O(5)–Nd(1)–O(7)#3   | 16.0(3)  | O(1)–Nd(1)–O(2)   | 50.3(3)  |
| O(10)–Nd(1)–O(7)#3  | 75.8(4)  | O(3)–Nd(1)–O(2)   | 123.1(3) |
| O(6)#1–Nd(1)–O(1)   | 85.2(5)  | O(4)–Nd(1)–O(2)   | 140.1(3) |
| O(2)#1–Nd(1)–O(1)   | 124.1(3) | O(6)#1–Nd(1)–C(7) | 68.3(4)  |
| O(8)#2–Nd(1)–O(1)   | 72.9(5)  | O(2)#1–Nd(1)–C(7) | 109.3(3) |
| O(9)–Nd(1)–O(1)     | 145.2(4) | O(8)#2–Nd(1)–C(7) | 70.9(4)  |
| O(5)–Nd(1)–O(1)     | 80.3(4)  | O(9)–Nd(1)–C(7)   | 86.3(4)  |
| O(10)–Nd(1)–O(1)    | 73.1(4)  | O(5)–Nd(1)–C(7)   | 157.8(4) |
| O(7)#3–Nd(1)–O(1)   | 96.1(4)  | O(10)–Nd(1)–C(7)  | 91.0(3)  |
| O(6)#1–Nd(1)–O(3)   | 76.3(4)  | O(7)#3–Nd(1)–C(7) | 151.2(4) |
| O(2)#1–Nd(1)–O(3)   | 133.4(3) | O(1)–Nd(1)–C(7)   | 104.4(3) |

|                   |          |                 |          |
|-------------------|----------|-----------------|----------|
| O(8)#2–Nd(1)–O(3) | 73.0(4)  | O(3)–Nd(1)–C(7) | 26.2(3)  |
| O(9)–Nd(1)–O(3)   | 100.0(4) | O(4)–Nd(1)–C(7) | 25.6(3)  |
| O(5)–Nd(1)–O(3)   | 142.0(4) | O(2)–Nd(1)–C(7) | 135.8(3) |

---

Symmetry transformations used to generate equivalent atoms: #1  $-x+1,-y+1,-z+2$ ; #2  $x,y,z+1$ ;  
#3  $-x+1,-y+1,-z+1$

**S**Table 2. Related bond lengths (Å) and angles (°) around the Nd(III) ion for 2.

|                     |           |                     |           |
|---------------------|-----------|---------------------|-----------|
| Nd(1)–O(5)#1        | 2.392(4)  | Nd(2)–O(2)#3        | 2.353(4)  |
| Nd(1)–O(5)#2        | 2.392(4)  | Nd(2)–O(2)          | 2.353(3)  |
| Nd(1)–O(1)          | 2.404(3)  | Nd(2)–O(4)#6        | 2.391(4)  |
| Nd(1)–O(1)#3        | 2.404(3)  | Nd(2)–O(4)#7        | 2.391(4)  |
| Nd(1)–O(3)#4        | 2.424(4)  | Nd(2)–O(6)          | 2.429(4)  |
| Nd(1)–O(3)#5        | 2.424(4)  | Nd(2)–O(6)#3        | 2.429(4)  |
| Nd(1)–O(7)          | 2.464(6)  | Nd(2)–O(9)          | 2.559(5)  |
| Nd(1)–O(8)          | 2.553(5)  |                     |           |
| O(5)#1–Nd(1)–O(5)#2 | 73.0(2)   | O(3)#4–Nd(1)–O(8)   | 74.71(1)  |
| O(5)#1–Nd(1)–O(1)   | 145.43(1) | O(3)#5–Nd(1)–O(8)   | 74.71(1)  |
| O(5)#2–Nd(1)–O(1)   | 85.12(1)  | O(7)–Nd(1)–O(8)     | 127.64(2) |
| O(5)#1–Nd(1)–O(1)#3 | 85.12(1)  | O(2)#3–Nd(2)–O(2)   | 84.68(2)  |
| O(5)#2–Nd(1)–O(1)#3 | 145.43(1) | O(2)#3–Nd(2)–O(4)#6 | 74.76(1)  |
| O(1)–Nd(1)–O(1)#3   | 99.63(2)  | O(2)–Nd(2)–O(4)#6   | 124.91(1) |
| O(5)#1–Nd(1)–O(3)#4 | 70.18(1)  | O(2)#3–Nd(2)–O(4)#7 | 124.91(1) |
| O(5)#2–Nd(1)–O(3)#4 | 112.12(1) | O(2)–Nd(2)–O(4)#7   | 74.76(1)  |
| O(1)–Nd(1)–O(3)#4   | 144.18(1) | O(4)#6–Nd(2)–O(4)#7 | 76.6(2)   |
| O(1)#3–Nd(1)–O(3)#4 | 83.78(1)  | O(2)#3–Nd(2)–O(6)   | 145.67(1) |
| O(5)#1–Nd(1)–O(3)#5 | 112.12(1) | O(2)–Nd(2)–O(6)     | 83.47(1)  |
| O(5)#2–Nd(1)–O(3)#5 | 70.18(1)  | O(4)#6–Nd(2)–O(6)   | 137.13(1) |
| O(1)–Nd(1)–O(3)#5   | 83.78(1)  | O(4)#7–Nd(2)–O(6)   | 82.42(1)  |
| O(1)#3–Nd(1)–O(3)#5 | 144.18(1) | O(2)#3–Nd(2)–O(6)#3 | 83.47(1)  |
| O(3)#4–Nd(1)–O(3)#5 | 74.0(2)   | O(2)–Nd(2)–O(6)#3   | 145.67(1) |
| O(5)#1–Nd(1)–O(7)   | 74.01(1)  | O(4)#6–Nd(2)–O(6)#3 | 82.42(1)  |
| O(5)#2–Nd(1)–O(7)   | 74.01(1)  | O(4)#7–Nd(2)–O(6)#3 | 137.13(1) |
| O(1)–Nd(1)–O(7)     | 74.42(1)  | O(6)–Nd(2)–O(6)#3   | 88.44(2)  |
| O(1)#3–Nd(1)–O(7)   | 74.42(1)  | O(2)#3–Nd(2)–O(9)   | 71.16(1)  |
| O(3)#4–Nd(1)–O(7)   | 139.30(1) | O(2)–Nd(2)–O(9)     | 71.16(1)  |
| O(3)#5–Nd(1)–O(7)   | 139.30(1) | O(4)#6–Nd(2)–O(9)   | 140.49(1) |
| O(5)#1–Nd(1)–O(8)   | 140.03(1) | O(4)#7–Nd(2)–O(9)   | 140.49(1) |
| O(5)#2–Nd(1)–O(8)   | 140.03(1) | O(6)–Nd(2)–O(9)     | 74.52(1)  |
| O(1)–Nd(1)–O(8)     | 72.51(1)  | O(6)#3–Nd(2)–O(9)   | 74.52(1)  |
| O(1)#3–Nd(1)–O(8)   | 72.51(1)  |                     |           |

Symmetry transformations used to generate equivalent atoms: #1  $x+1/2, -y+3/2, -z+3/2$ ; #2  $x+1/2, y, -z+3/2$ ; #3  $x, -y+3/2, z$ ; #4  $-x+1, y+1/2, -z+1$ ; #5  $-x+1, -y+1, -z+1$ ; #6  $-x+1/2, y+1/2, z+1/2$ ; #7  $-x+1/2, -y+1, z+1/2$

**STable 3.** Related bond lengths (Å) and angles (°) around the Nd(III) ion for **3**.

|                  |           |                 |           |
|------------------|-----------|-----------------|-----------|
| Nd–O(4)#1        | 2.363(4)  | Nd–O(7)         | 2.516(4)  |
| Nd–O(2)#2        | 2.391(4)  | Nd–O(6)         | 2.519(4)  |
| Nd–O(1)          | 2.395(4)  | Nd–O(5)         | 2.548(4)  |
| Nd–O(3)#3        | 2.451(4)  | Nd–O(8)         | 2.472(3)  |
| O(4)#1–Nd–O(2)#2 | 85.76(1)  | O(3)#3–Nd–O(6)  | 72.66(1)  |
| O(4)#1–Nd–O(1)   | 157.56(1) | O(8)–Nd–O(6)    | 126.98(1) |
| O(2)#2–Nd–O(1)   | 103.58(1) | O(7)–Nd–O(6)    | 147.80(1) |
| O(4)#1–Nd–O(3)#3 | 107.75(1) | O(4)#1–Nd–O(5)  | 123.31(1) |
| O(2)#2–Nd–O(3)#3 | 145.42(1) | O(2)#2–Nd–O(5)  | 71.37(1)  |
| O(1)–Nd–O(3)#3   | 76.12(1)  | O(1)–Nd–O(5)    | 79.14(1)  |
| O(4)#1–Nd–O(8)   | 74.80(1)  | O(3)#3–Nd–O(5)  | 74.72(1)  |
| O(2)#2–Nd–O(8)   | 137.72(1) | O(8)–Nd–O(5)    | 149.98(1) |
| O(1)–Nd–O(8)     | 84.93(1)  | O(7)–Nd–O(5)    | 126.64(1) |
| O(3)#3–Nd–O(8)   | 76.84(1)  | O(6)–Nd–O(5)    | 51.37(1)  |
| O(4)#1–Nd–O(7)   | 88.92(1)  | O(4)#1–Nd–C(2)  | 99.21(1)  |
| O(2)#2–Nd–O(7)   | 70.14(1)  | O(2)#2–Nd–C(18) | 74.89(1)  |
| O(1)–Nd–O(7)     | 75.59(1)  | O(1)–Nd–C(18)   | 102.91(1) |
| O(3)#3–Nd–O(7)   | 139.45(1) | O(3)#3–Nd–C(18) | 71.63(1)  |
| O(8)–Nd–O(7)     | 72.28(1)  | O(8)–Nd–C(18)   | 144.34(1) |
| O(4)#1–Nd–O(6)   | 74.69(1)  | O(7)–Nd–C(18)   | 143.36(1) |
| O(2)#2–Nd–O(6)   | 80.99(1)  | O(6)–Nd–C(18)   | 25.73(1)  |
| O(1)–Nd–O(6)     | 126.49(1) | O(5)–Nd–C(18)   | 25.65(1)  |

Symmetry transformations used to generate equivalent atoms: #1  $-x+1/2, y-1/2, -z+3/2$ ; #2  $-x, -y, -z+1$ ; #3  $x+1/2, -y+1/2, z-1/2$

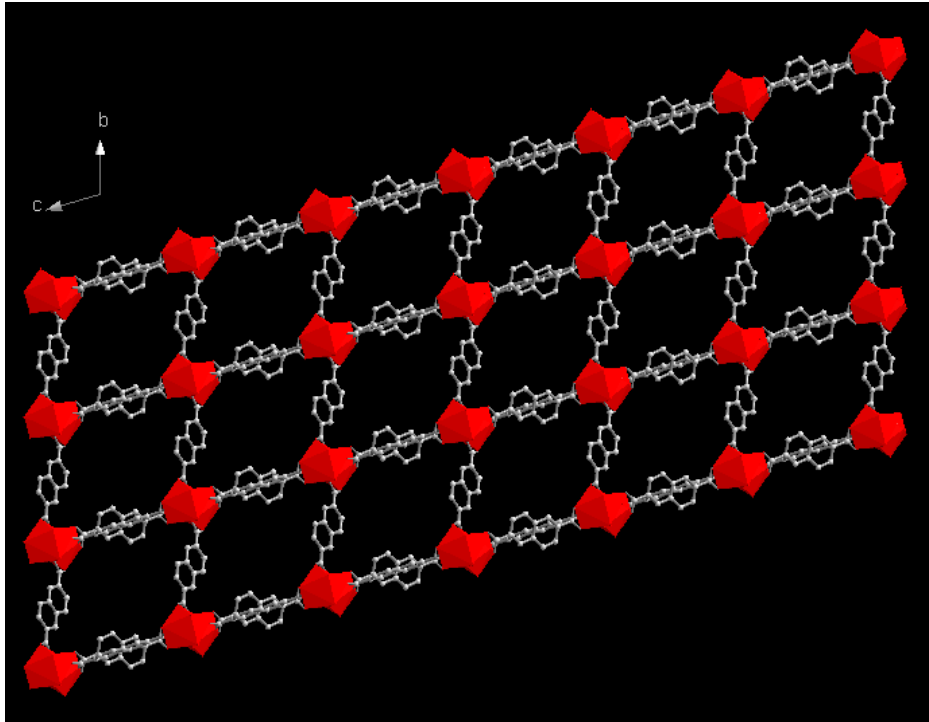

SFigure 1

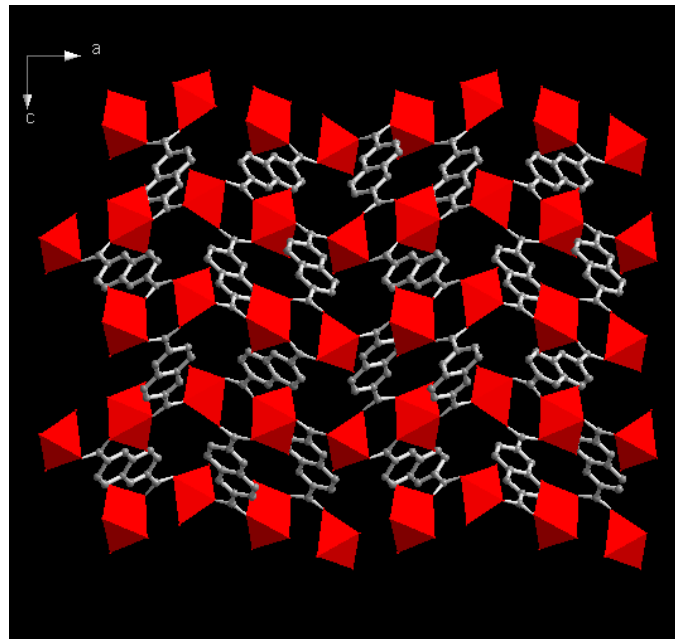

SFigure 2

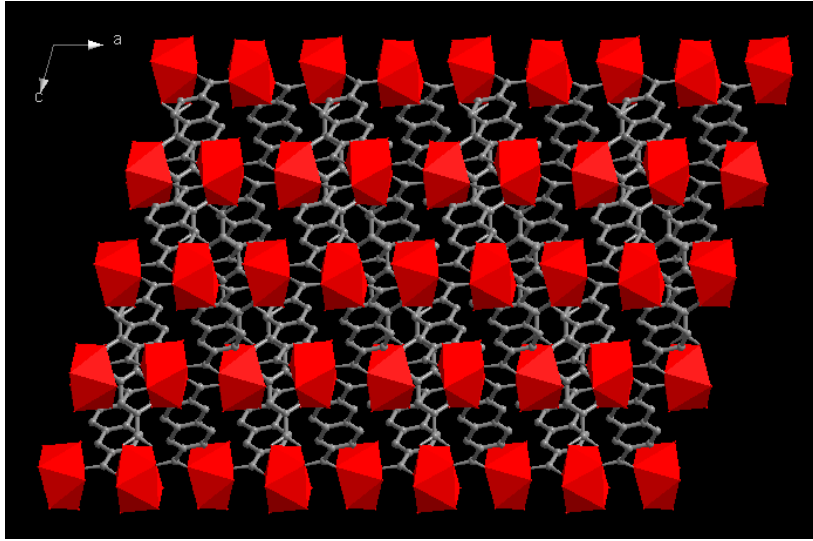

SFigure 3

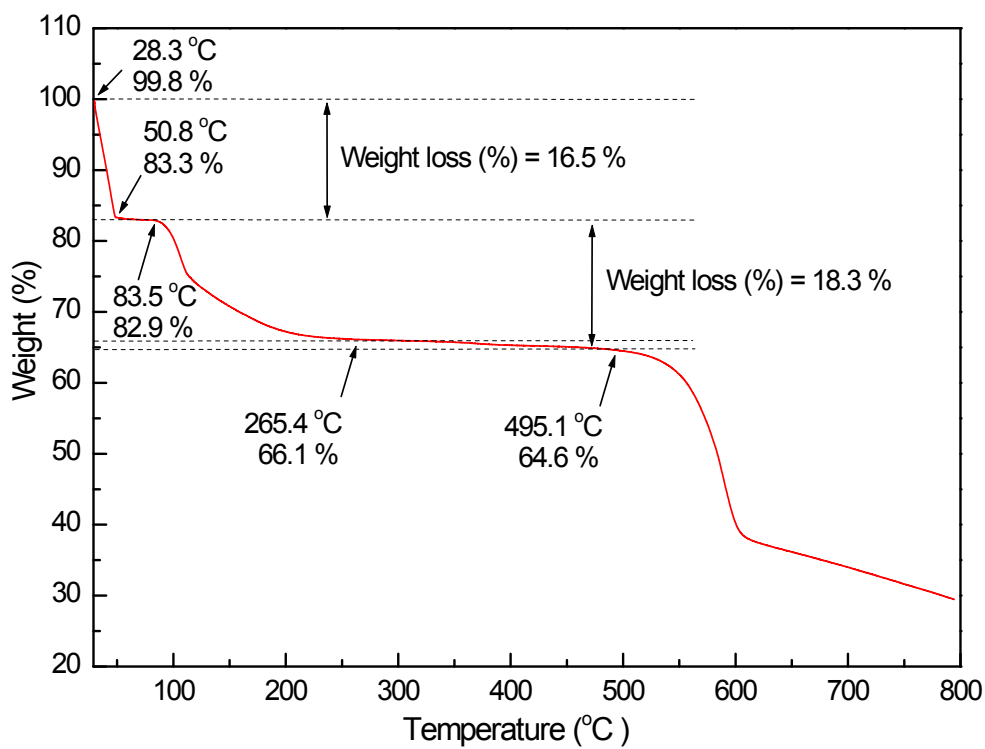

(a)

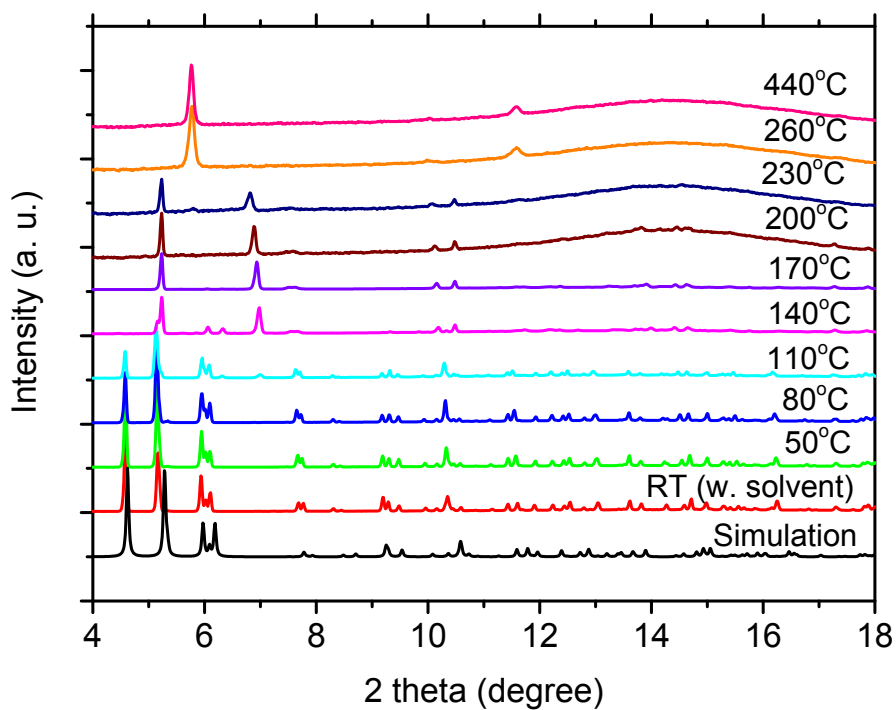

(b)

SFigure 4



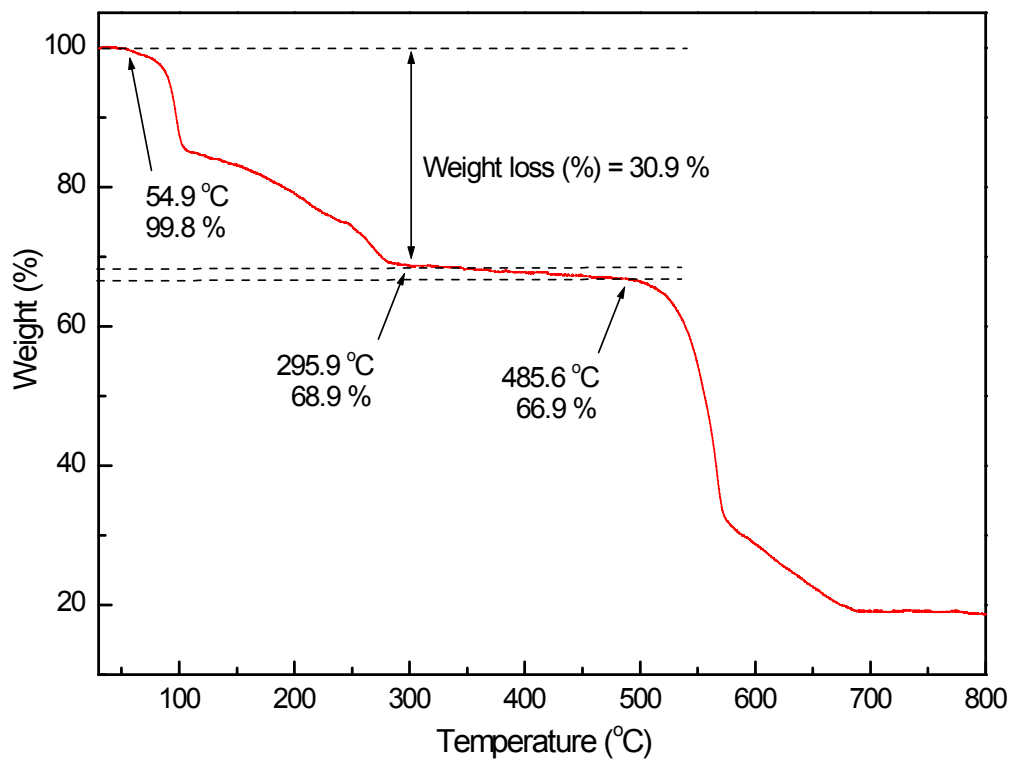

(a)

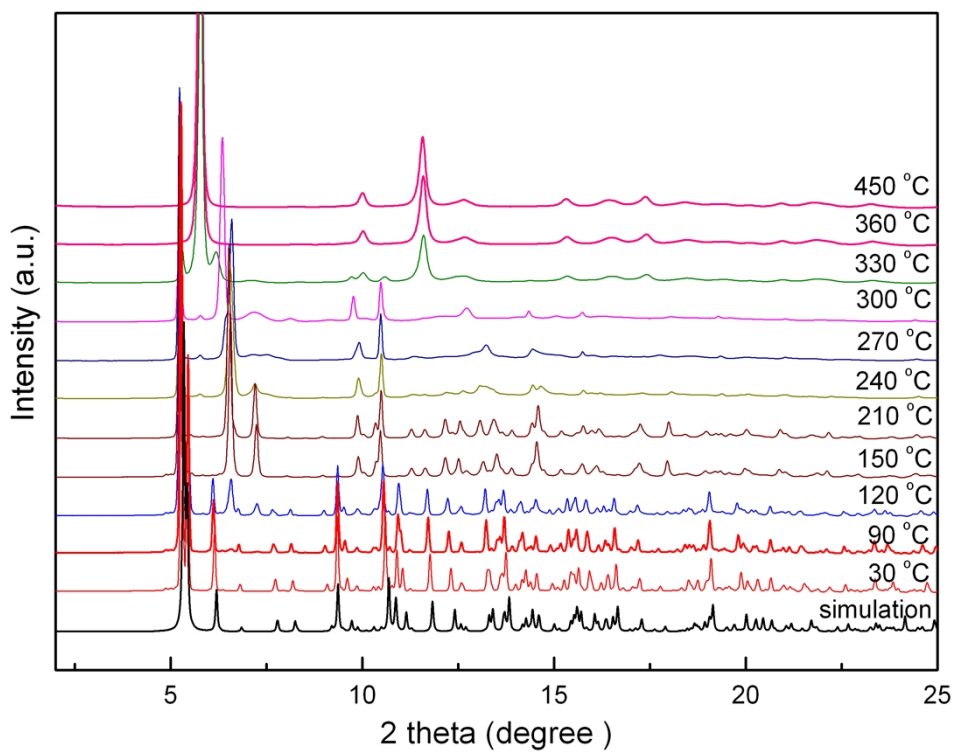

(b)

SFigure 5

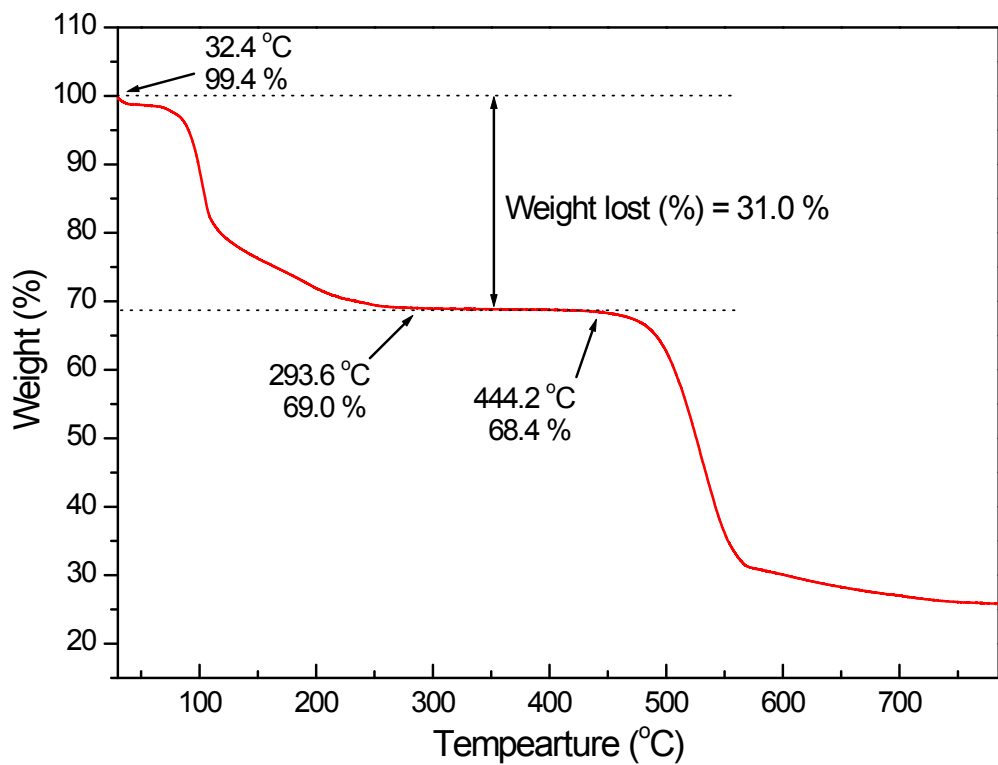

(a)

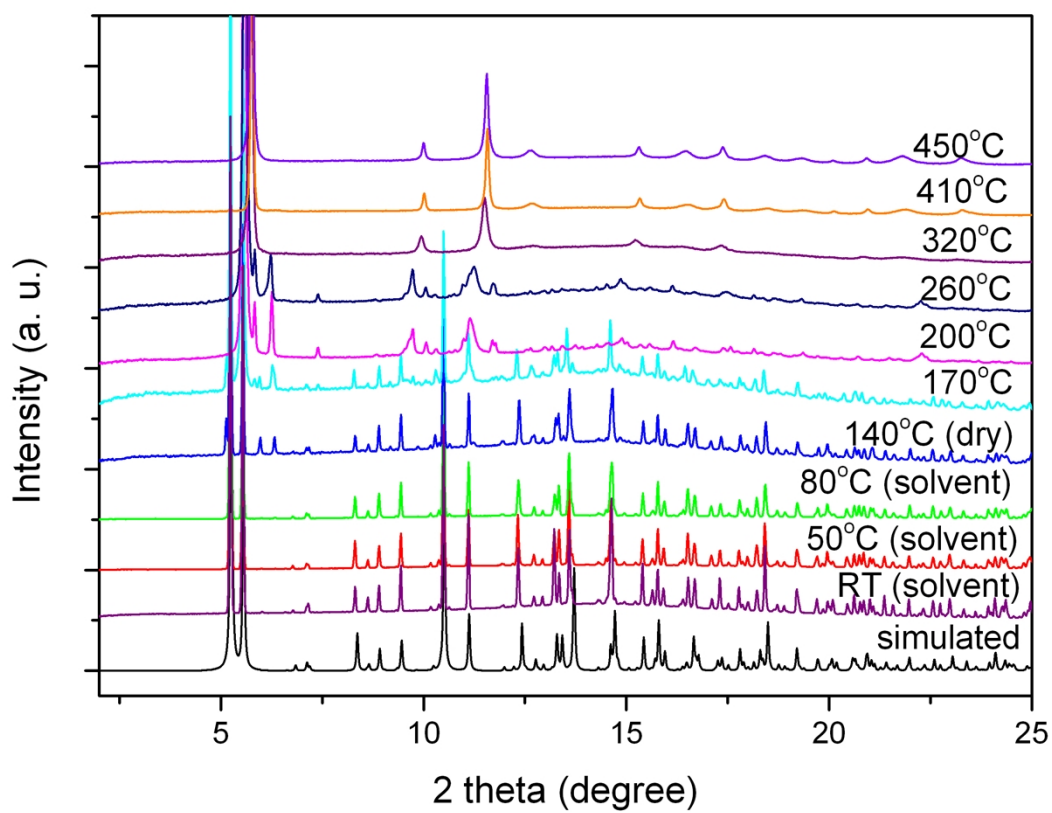

(b)

SFigure 6
